# Supplementary material for: Low-cost, automated reaction screening for energetic precursor cage compounds by a benchtop liquid handling robot and desorption electrospray ionization mass spectrometry
Source: Royal Society of Chemistry journal article supplement (doi:10.1039/d2re00254j), 2022-11-14
Supplement: d2re00254j4.pdf [file d2re00254j4.pdf]

## Supporting Information

### Low-Cost, Automated Reaction Screening for Energetic Precursor Cage Compounds by a Benchtop Liquid Handling Robot and Desorption Electrospray Ionization Mass Spectrometry

Hilary M. Brown,<sup>a</sup> Patrick W. Fedick<sup>\*a</sup>

<sup>a</sup> Chemistry Division, Naval Air Warfare Center Weapons Division (NAWCWD), United States Navy Naval Air Systems Command (NAVAIR), China Lake, California 93555, USA.

\* Correspondence to: Patrick W. Fedick ([patrick.w.fedick.civ@us.navy.mil](mailto:patrick.w.fedick.civ@us.navy.mil)).

#### Table of Contents

|                                                                   |     |
|-------------------------------------------------------------------|-----|
| <b>Figure S1.</b> Custom DESI slide holder. ....                  | S-2 |
| <b>Figure S2.</b> Assembly of DESI spray emitter. ....            | S-3 |
| <b>Figure S3.</b> DESI stage assembly. ....                       | S-4 |
| <b>Table S1.</b> Parts list for the DESI setup. ....              | S-5 |
| <b>Figure S4.</b> Progression of DESI setup. ....                 | S-6 |
| <b>Figure S5.</b> Full scan mass spectra of amine screening. .... | S-7 |
| <b>Figure S6.</b> Full scan mass spectra of acid screening. ....  | S-8 |

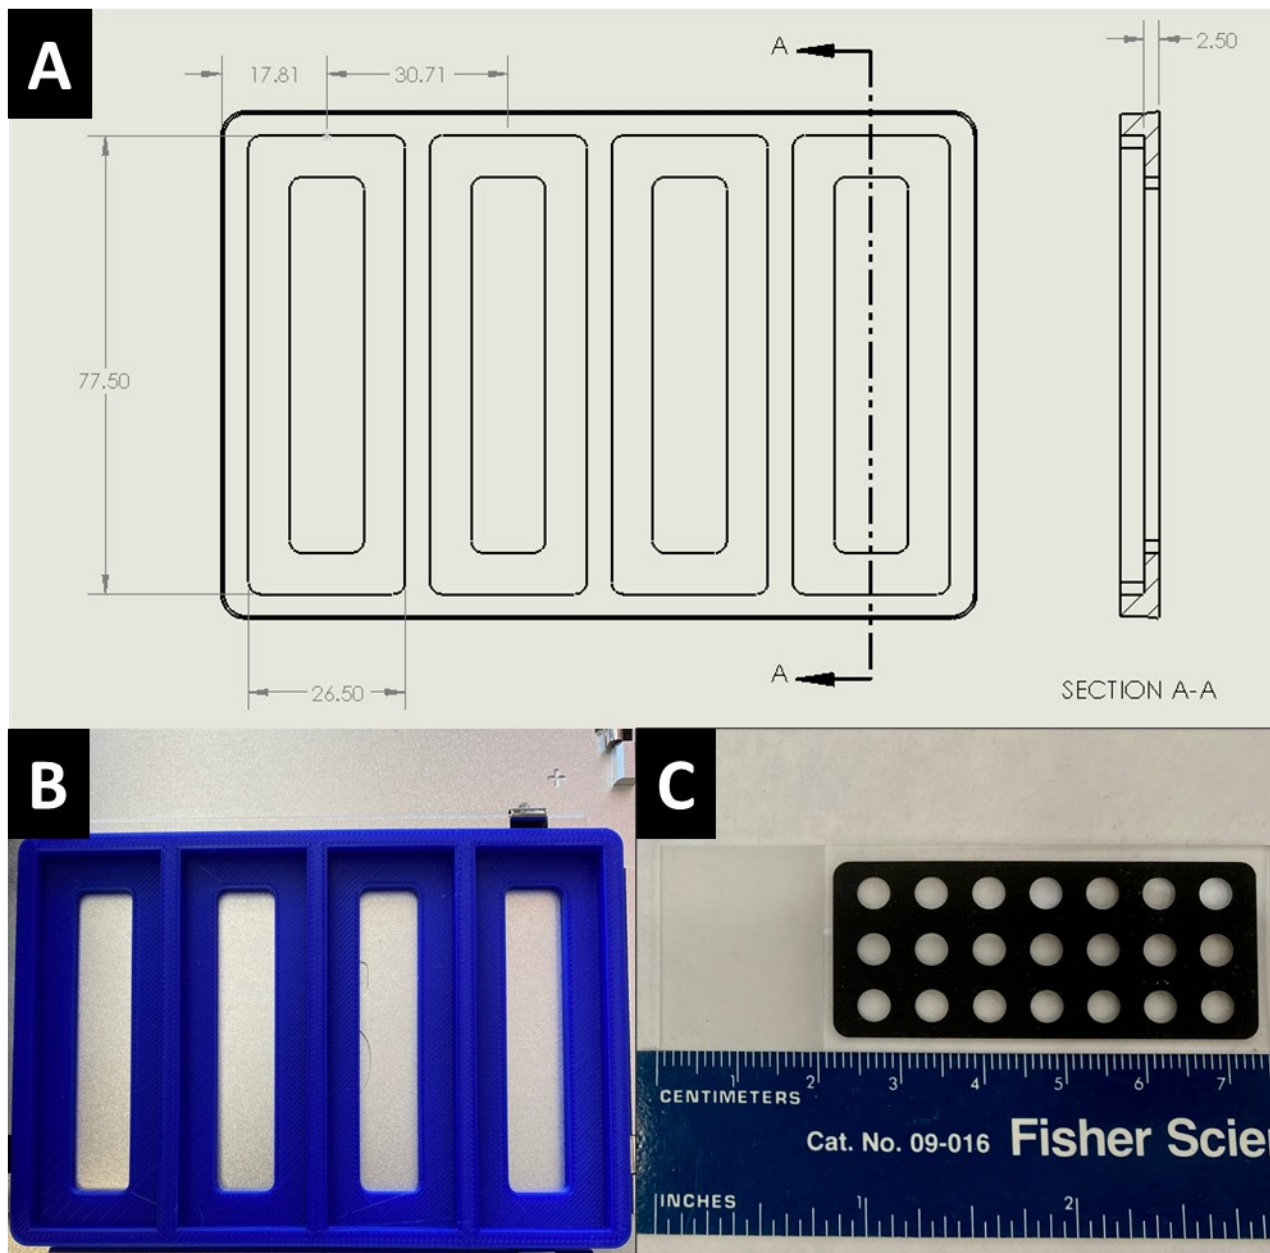

**Figure S1.** (A) Schematic of the DESI slide holder designed by Opentrons. Dimensions in mm (B) Photo of the 3D-printed DESI slide holder. (C) Photo of the glass PTFE coated slide.

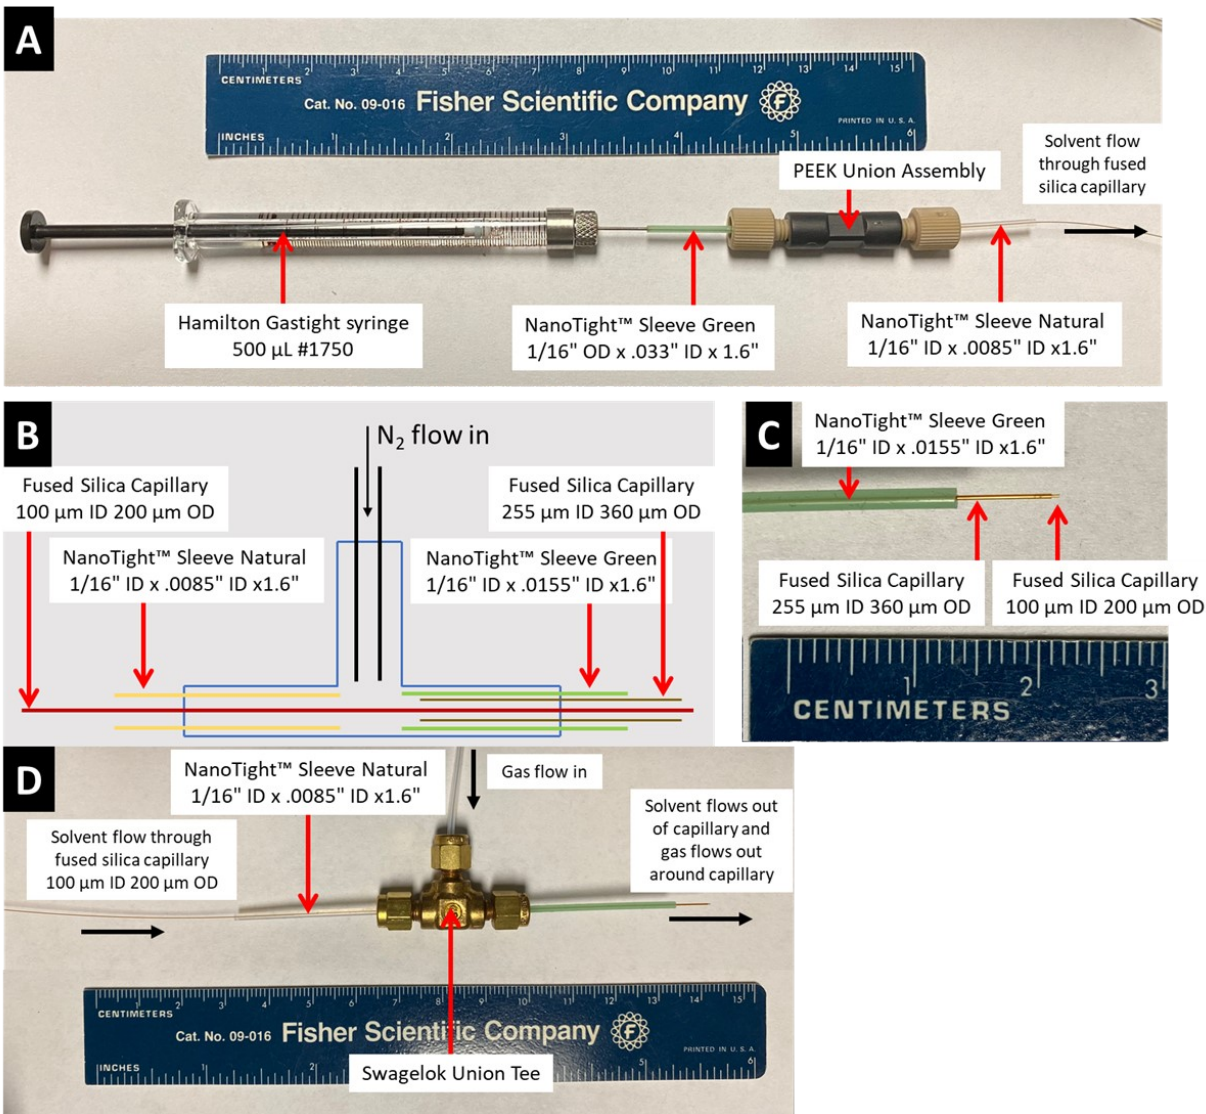

**Figure S2.** (A) Parts and assembly of the syringe and fittings needed to connect the syringe to the fused silica capillary tubing. (B) Schematic drawing of the spray emitter showing how the capillaries are placed within each other and held by the NanoTight™ sleeves. (C) Zoomed view of the spray emitter tip to show inner 100x200 µm capillary within 255x360 µm capillary. (D) Assembly of parts and fittings needed for the spray emitter.

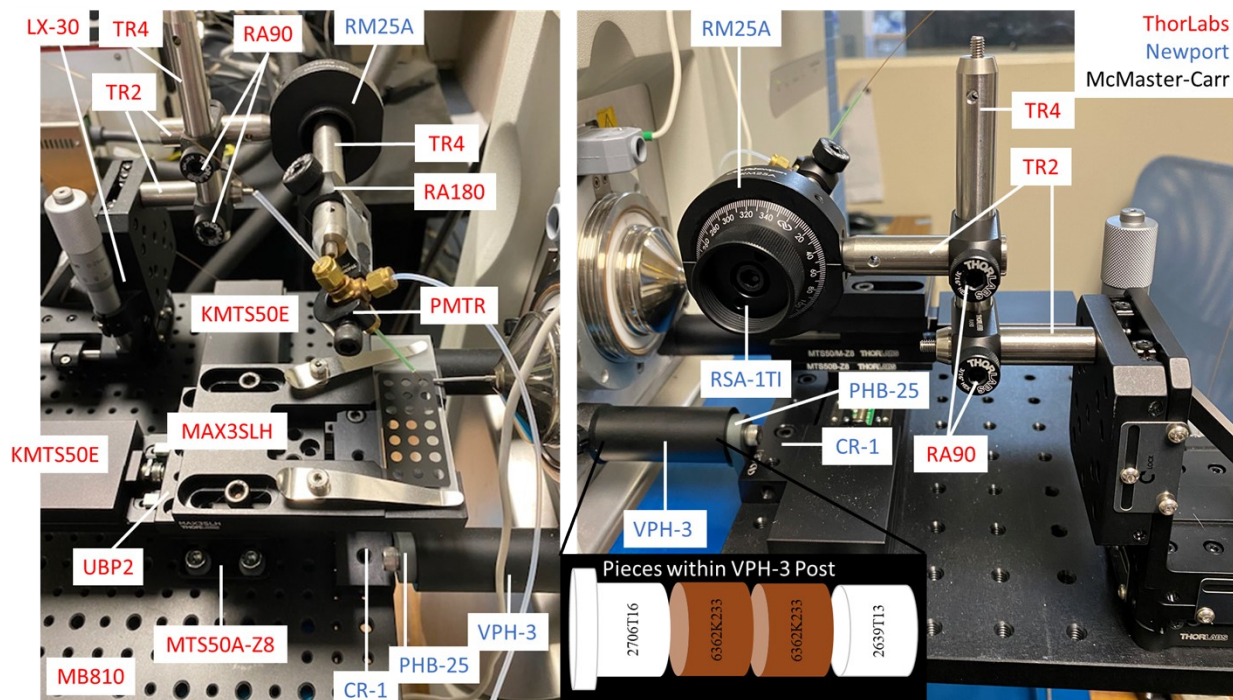

**Figure S3.** Pictures of the complete DESI stage setup. Part numbers are included for comparison with the full part list and for easy reference when constructing. Red part numbers were ordered from Thorlabs, blue part numbers were ordered from Newport, and black part numbers were ordered from McMaster-Carr.

**Table S1.** Parts list for the DESI emitter and xy translational stage setup.

|                                                                                 | NAME                                                     | PART NUMBER  | COMPANY                        | PRICE      | QUANTITY | PURPOSE                                        |                                                                        |
|---------------------------------------------------------------------------------|----------------------------------------------------------|--------------|--------------------------------|------------|----------|------------------------------------------------|------------------------------------------------------------------------|
| <b>PIECES NEED TO ATTACH BREADBOARD TO LTQ</b>                                  | PTFE Flanged Sleeve Bearings                             | 2706T16      | McMaster-Carr                  | \$6.78     | 2        | \$13.56                                        | Fill VPH-3 post holder for tight fit on LTQ pegs                       |
|                                                                                 | Rulon LR Sleeve Bearing                                  | 6362K233     | McMaster-Carr                  | \$5.35     | 4        | \$21.40                                        | Fill VPH-3 post holder for tight fit on LTQ pegs                       |
|                                                                                 | PTFE Sleeve Bearing                                      | 2639T13      | McMaster-Carr                  | \$6.43     | 2        | \$12.86                                        | Fill VPH-3 post holder for tight fit on LTQ pegs                       |
|                                                                                 | Optical Post Holder                                      | VPH-3        | Newport                        | \$16.50    | 2        | \$33.00                                        | Post holder to attach platform to LTQ                                  |
|                                                                                 | Post Holder Base                                         | PHB-25       | Newport                        | \$5.25     | 2        | \$10.50                                        | Connect post holder to construction rail                               |
|                                                                                 | Construction Rail                                        | CR-1         | Newport                        | \$22.00    | 1        | \$22.00                                        | Connect post holder base to breadboard                                 |
|                                                                                 | Aluminum Breadboard                                      | MSB12        | ThorLabs                       | \$227.63   | 1        | \$227.63                                       | Breadboard build stage upon                                            |
| <b>XY STAGE PARTS FOR SLIDE</b>                                                 | XY Stage                                                 | KMTS50E      | ThorLabs                       | \$1,659.87 | 2        | \$3,319.74                                     | Motorized translational stage with power supply                        |
|                                                                                 | Base Plate for Translation Stages                        | MTS50A-Z8    | ThorLabs                       | \$86.03    | 1        | \$86.03                                        | Attach xy stage to breadboard                                          |
|                                                                                 | Universal Base Plate                                     | UBP2         | ThorLabs                       | \$38.69    | 1        | \$38.69                                        | Connecting piece between Y stage and slide holder                      |
|                                                                                 | Microscopy Slide Holder                                  | MAX3SLH      | ThorLabs                       | \$134.73   | 1        | \$134.73                                       | Slide holder                                                           |
| <b>PARTS NEEDED TO HOLD DESI EMITTER AND HAVE XYZ/ANGLE CONTROL</b>             | Right-Angle End Clamp for Ø1/2" Posts                    | RA180        | ThorLabs                       | \$11.46    | 1        | \$11.46                                        | Building blocks for ESI holder                                         |
|                                                                                 | Right-Angle Clamp for Ø1/2" Posts                        | RA90         | ThorLabs                       | \$10.05    | 2        | \$20.10                                        | Building blocks for ESI holder                                         |
|                                                                                 | Ø1/2" Optical Post, L=2                                  | TR2          | ThorLabs                       | \$5.35     | 2        | \$10.70                                        | Building blocks for ESI holder                                         |
|                                                                                 | Ø1/2" Optical Post, L=4                                  | TR4          | ThorLabs                       | \$6.05     | 2        | \$12.10                                        | Building blocks for ESI holder                                         |
|                                                                                 | Optic Rotation Mount, 25.4 mm, 2° Graduations            | RM25A        | Newport                        | \$92.00    | 1        | \$92.00                                        | Control angle of DESI sprayer                                          |
|                                                                                 | Self-Contained XYZ 25 mm Translation Stage, 1/4"-20 Taps | LX-30        | ThorLabs                       | \$1,545.00 | 1        | \$1,545.00                                     | Control xyz position of DESI sprayer                                   |
|                                                                                 | Solid Insert, RSP-1T Rotation Stage                      | RSA-1TI      | Newport                        | \$14.00    | 1        | \$14.00                                        | Insert for rotation mount to allow post connection                     |
| Component Clamp for Ø1/2" Posts, 1/4"-20 Taps                                   | PMTR                                                     | ThorLabs     | \$26.51                        | 1          | \$26.51  | Connect DESI sprayer to post                   |                                                                        |
| <b>ESI EMITTER PARTS</b>                                                        | NanoTight™ Sleeve Green 1/16" ID x .0155" ID x 1.6"      | F-242        | IDEX                           | \$2.66     | 1        | \$2.66                                         | Sleeve to hold silica capillary on spray side                          |
|                                                                                 | NanoTight™ Sleeve Natural 1/16" ID x .0085" ID x 1.6"    | F-239        | Cole-Parmer                    | \$2.60     | 2        | \$5.20                                         | Sleeve to hold silica capillary from syringe union to spray tee        |
|                                                                                 | NanoTight™ Sleeve Green 1/16" OD x .033" ID x 1.6"       | F-247        | IDEX                           | \$2.66     | 1        | \$2.66                                         | Sleeve to insert syringe                                               |
|                                                                                 | PEEK ZDV Union Assembly 10-32 Coned                      | P-704        | IDEX                           | \$35.86    | 1        | \$35.86                                        | Union to connect syringe and fused silica capillary                    |
|                                                                                 | PTFE Tubing                                              | EW-06417-51  | Cole-Parmer                    | \$56.00    | 1        | \$56.00                                        | Tubing provides N2 gas to emitter from gas tank                        |
|                                                                                 | Fused Silica Capillary 100 µm ID x 200 µm OD (L=10m)     | 1068150021   | Molex/Polymicro                | \$13.26    | 1        | \$13.26                                        | Silica tubing for spray solvent                                        |
|                                                                                 | Fused Silica Capillary 255 µm ID x 360 µm OD (L=10m)     | 1068150026   | Molex/Polymicro                | \$8.97     | 1        | \$8.97                                         | Silica tubing for gas flow around silica tubing used for spray solvent |
|                                                                                 | Brass Swagelok Tube Fitting, Union Tee, 1/16 in. Tube OD | B-100-3      | Swagelok                       | \$44.21    | 1        | \$44.21                                        | Union to connect fused silica capillary, gas input, and emitter        |
|                                                                                 | 2 cm Extended Capillary (Bent In-House 10°)              | SIS20198IS   | Scientific Instrument Services | \$265.00   | 1        | \$265.00                                       | Mass spectrometer inlet                                                |
| PTFE Printed Slides, 21 Wells, 4 mm Diameter, 3 in x 1 in (76x25 mm) Box of 100 | 02289-AB                                                 | SPI Supplies | \$77.94                        | 1          | \$77.94  | DESI slides for spotting                       |                                                                        |
| High-Purity Line Regulator - Brass                                              | 3420 Series                                              | Matheson     | \$497.48                       | 1          | \$497.48 | Regulator for House N <sub>2</sub> Max 200 PSI |                                                                        |

|  |       |            |
|--|-------|------------|
|  | Total | \$6,661.25 |
|--|-------|------------|

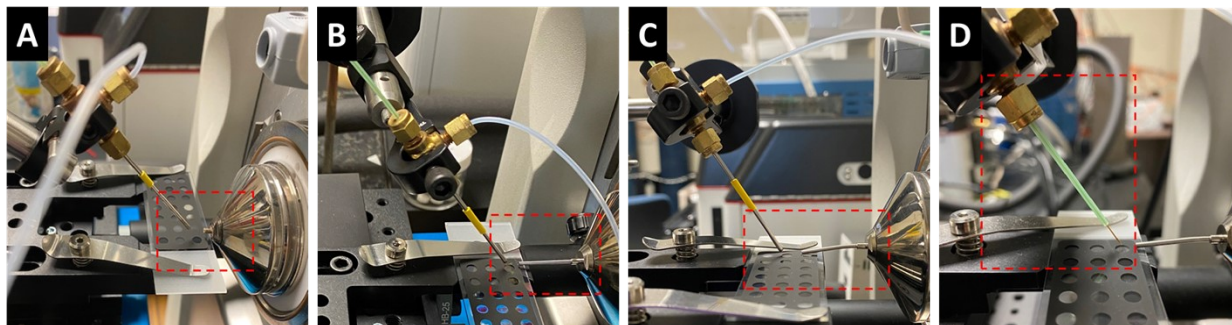

**Figure S4.** Progression pictures of the emitter and the mass spectrometer inlet. **(A)** The original DESI setup constructed with a stainless-steel tubing emitter, a 100 $\mu\text{m}$  ID x 360 $\mu\text{m}$  OD capillary and a standard ion transfer capillary. **(B)** The standard ion transfer capillary was replaced with a 2cm extended capillary. **(C)** The extended capillary was bent  $\sim 10^\circ$  towards the slide to improve ion collection. **(D)** The stainless-steel emitter was replaced with a capillary within a capillary setup.

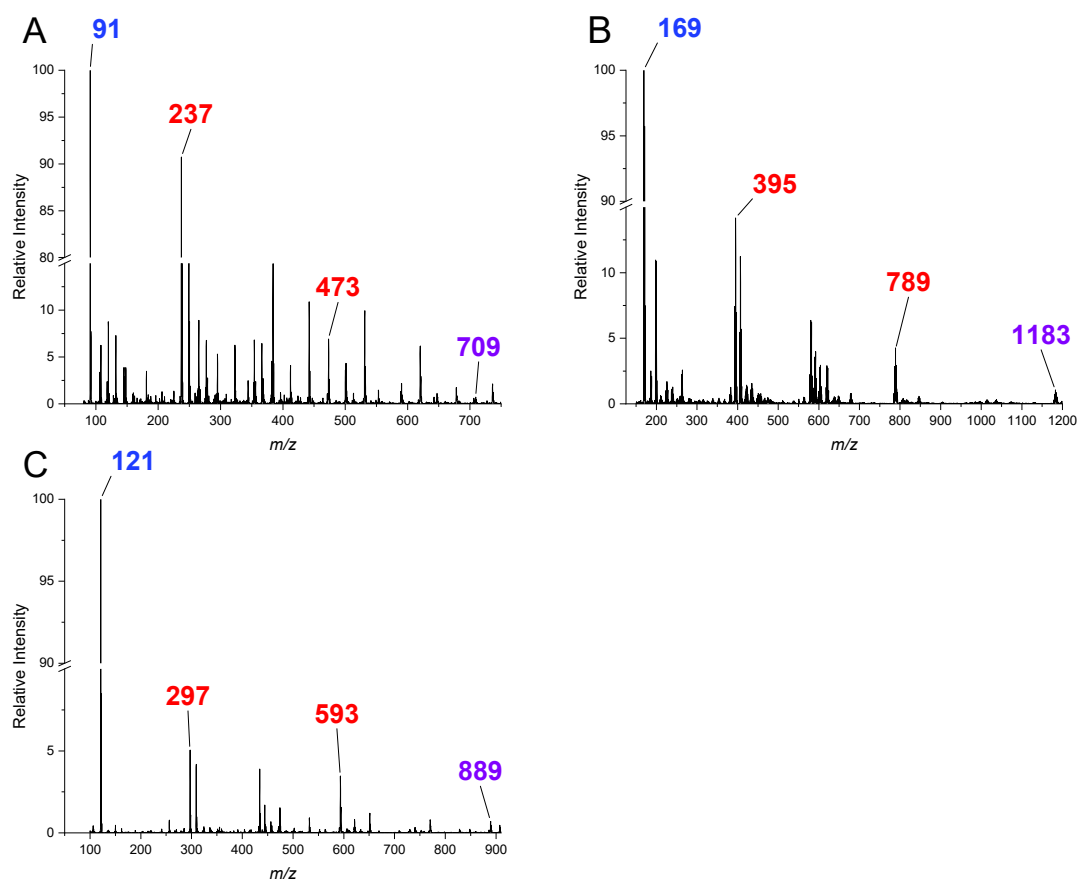

**Figure S5.** The averaged spectra over one spot on a DESI-MS line scan for screening amine analogs, **(A)** benzylamine, **(B)** bromo-benzylamine, and **(C)** methoxy-benzylamine, for the formation of the energetic precursor cage compounds. Starting materials are indicated with the blue  $m/z$  labels, intermediates with red  $m/z$  labels, and products with purple  $m/z$  labels.



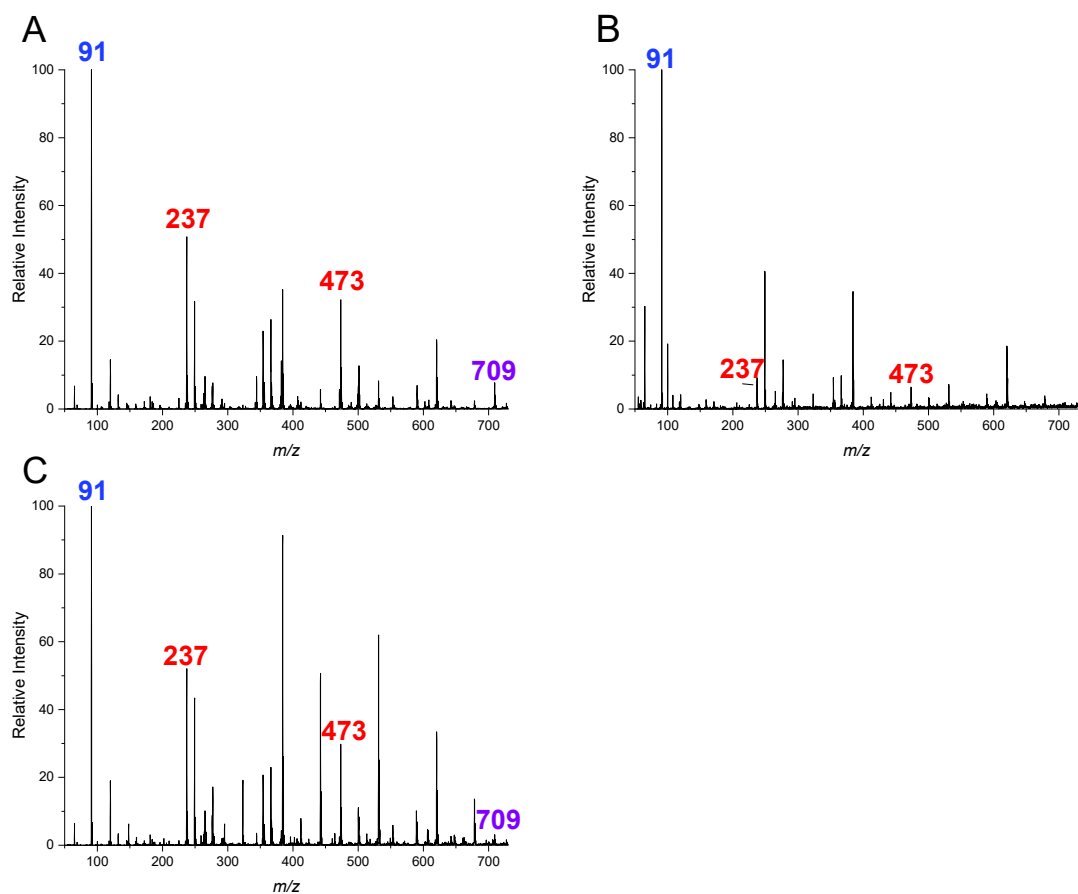

**Figure S6.** The averaged spectra over one spot on a DESI-MS line scan for screening acid catalysts, **(A)** formic acid, **(B)** trifluoroacetic acid, and **(C)** acetic acid, for the reaction of benzylamine and glyoxal to form the energetic precursor cage compound 2,4,6,8,10,12-hexabenzyl-2,4,6,8,10,12-hexaazaisowurtzitane (HBIW). Starting materials are indicated with the blue  $m/z$  labels, intermediates with red  $m/z$  labels, and products with purple  $m/z$  labels.
